# Supplementary material for: Larger whole brain grey matter associated with long-term Sahaja Yoga Meditation: A detailed area by area comparison
Source: PLoS One. 2020 Dec 28;15(12):e0237552. doi: 10.1371/journal.pone.0237552 (PMC7769288; doi:10.1371/journal.pone.0237552)
Supplement: S1 Table — (XLSX) [file pone.0237552.s002.xlsx]

## Sheet: Hoja1
Volunteer C= control, M=meditator	Sex: XX=1, XY=0	Meditador	Age, years	Grey_matter, mL	White_matter, mL	CSF, mL	TIV, mL	Left_brainstem	Left_cerebellum	Left_frontal_lobe	Left_hemisphere	Left_parietal_lobe	Left_sublobar	Left_limbic_lobe	Left_occipital_lobe	Left_temporal_lobe	Right_brainstem	Right_cerebellum	Right_frontal_lobe	Right_hemisphere	Right_occipital_lobe	Right_sublobar	Right_limbic_lobe	Right_parietal_lobe	Right_temporal_lobe
C01	0	0	39.1667	732.276	598.425	298.23	1628.93	1.94695	43.5876	96.9368	330.067	38.7799	28.2635	31.0064	35.0442	54.0451	2.14198	44.8707	100.563	341.88	34.6698	27.9687	33.0202	42.9386	55.3723
C02	0	0	39.6667	662.941	463.668	225.297	1351.91	1.5434	45.9072	86.287	301.814	34.4625	28.0365	27.1266	29.0604	48.962	2.00007	45.1925	86.3832	307.948	29.5057	27.3356	29.6024	37.4555	50.0861
C03	1	0	55.5833	558.386	420.555	187.856	1166.8	1.1759	34.2577	70.9122	251.976	31.0185	22.6995	24.5885	24.5041	42.5162	1.51593	35.2358	72.9811	262.131	24.6686	24.2521	26.3013	33.6384	43.1901
C04	1	0	51.5	587.446	467.312	158	1212.76	1.31664	36.9383	78.733	270.504	34.1285	24.6089	23.5479	27.486	43.3067	1.59495	37.9062	78.5876	270.459	26.7606	23.6124	24.5404	34.5749	42.4627
C05	1	0	27.5833	579.296	434.745	263.481	1277.52	1.5123	42.3845	74.5386	263.07	31.1056	23.1532	22.7484	26.2455	41.0689	1.69788	44.2422	74.8601	269.813	24.8866	23.5312	24.4359	33.1381	42.703
C06	1	0	44.6667	654.523	513.963	230.764	1399.25	1.50518	43.4928	81.6256	297.706	35.0583	26.25	27.5265	32.5056	49.3802	2.30354	41.9735	81.6971	307.118	31.8152	28.7242	29.6093	40.3721	50.2743
C07	1	0	22.1667	631.225	406.666	244.793	1282.68	1.44211	43.4948	80.854	285.619	34.0767	23.9126	26.1522	28.9646	46.3006	1.90681	44.8738	81.0082	294.136	29.2663	24.6951	27.948	35.9658	48.02
C08	1	0	57.9167	577.324	479.143	269.106	1325.57	1.74503	39.2511	68.3401	260.195	30.4365	22.93	26.5584	27.1196	43.4809	1.41821	40.512	71.6214	268.809	22.9947	23.9262	29.5717	33.3885	45.0079
C09	1	0	45.9167	655.777	510.023	378.418	1544.22	1.39697	39.8169	84.1165	293.268	34.3532	25.5752	28.0022	30.6052	49.0013	1.69147	40.873	85.6413	308.723	32.6581	27.1366	30.0422	39.6168	50.7241
C10	1	0	48.4167	683.181	514.055	243.844	1441.08	1.76857	37.5487	88.1543	311.206	39.8131	26.6095	28.8314	31.3764	56.6799	1.7995	38.9109	89.4689	318.67	29.6536	27.7151	31.7573	42.7989	56.2061
C11	1	0	21.25	696.156	430.851	196.631	1323.64	2.12853	41.1891	92.4784	314.084	40.2606	28.1506	26.2473	33.6536	49.4891	1.69159	42.2297	96.3407	326.911	32.5068	29.2404	30.441	41.7459	52.2219
C12	1	0	63.3333	455.078	379.27	175.292	1009.64	1.36445	36.6714	51.4493	206.04	23.9962	19.8787	19.1937	21.8664	31.385	1.52435	37.0985	53.5348	212.099	20.1812	20.0354	21.3534	25.4304	32.6997
C13	1	0	48.5	552.192	390.667	198.232	1141.09	1.42325	38.8774	68.3106	250.983	29.6809	21.7341	23.6469	24.7297	42.2055	1.5789	39.2149	69.7423	256.112	23.426	21.6147	24.7958	31.8539	43.5305
C14	1	0	50.5	544.331	433.255	246.139	1223.73	1.19115	38.9098	65.8732	246.311	31.2914	20.7894	22.6582	24.6829	40.6156	1.46406	41.1994	66.6743	254.507	23.2911	21.9176	24.789	32.1478	42.7289
C15	1	0	56.3333	500.992	422.577	262.226	1185.8	0.927722	36.7838	61.3013	226.613	24.7586	19.0264	21.9176	24.1946	37.4239	1.0688	36.2355	62.9385	234.069	23.9009	19.7382	22.614	26.2803	40.9995
C16	1	0	53.25	532.312	403.593	275.442	1211.35	1.32446	35.0417	65.0407	241.644	30.2442	23.4104	22.3352	25.1121	38.7568	1.9844	34.2653	67.7871	247.244	21.987	23.2464	23.8375	31.5498	42.1682
C17	0	0	49.3333	661.341	553.806	455.238	1670.38	1.43357	50.2675	75.2469	295.388	36.6035	26.0289	26.7628	30.4791	48.2199	1.7142	49.1619	80.651	307.662	32.8476	26.6563	27.7523	37.5946	50.9204
C18	0	0	48.3333	633.98	538.847	339.197	1512.02	1.45349	42.6863	78.8114	287.318	32.4198	25.8518	26.1456	33.4213	46.1512	1.73513	43.8932	79.4543	295.294	31.7813	26.5661	28.9005	35.6573	46.9517
C19	0	0	49.8333	727.54	581.915	272.099	1581.55	2.09764	49.3908	87.831	327.437	40.255	28.6633	29.9298	36.8721	52.0275	1.80217	52.0227	88.9841	339.552	35.4037	28.882	33.3296	43.0288	55.7264
C20	1	0	59.0833	532.078	456.979	319.93	1308.99	1.09559	40.254	62.3066	240.279	27.8915	21.1534	22.5465	25.5269	39.1995	1.38875	40.561	63.8738	247.642	25.0433	22.369	23.6647	30.8054	39.6636
C21	0	0	40.5833	705.434	518.879	365.552	1589.86	1.68494	46.3774	91.0563	320.055	38.3209	28.3128	26.7176	34.2668	52.8244	1.47986	46.9201	95.1712	326.793	32.2013	29.0618	27.7036	40.3777	53.4451
C22	1	0	51.4167	600.521	545.524	202.672	1348.72	1.29537	37.8743	75.9783	273.086	35.1993	26.1138	25.3475	28.681	42.2721	1.43413	39.1604	79.5678	280.901	26.8175	25.3269	27.9948	36.3252	43.8606
C23	1	0	45.0833	588.777	477.452	258.644	1324.87	1.14305	40.7241	74.9304	267.59	30.103	24.0381	25.7074	26.2088	44.3739	1.47104	41.2986	74.4173	274.693	27.5819	24.6176	27.502	33.4012	43.9753
M01	1	1	20.25	710.589	494.006	268.914	1473.51	1.19493	42.206	96.711	321.496	40.4661	27.5615	29.7076	31.2847	51.8319	1.63888	42.3078	98.4405	334.425	31.114	28.8385	31.9574	44.305	55.2655
M02	1	1	22.5	682.715	477.565	263.49	1423.77	1.64129	46.8425	87.07	309.322	38.3544	25.431	27.7111	31.2492	50.5868	1.82521	46.9089	88.5928	317.435	28.9331	26.6882	29.8639	41.4676	52.7219
M03	0	1	41.25	681.317	501.053	338.798	1521.17	1.2521	50.8377	84.5227	309.15	35.4732	26.0192	27.8187	31.8062	51.0351	1.87335	51.1886	84.2146	315.748	31.1898	27.5743	29.7536	38.0897	51.5103
M04	1	1	49.8333	627.019	439.784	257.883	1324.69	1.64965	40.8413	82.2934	280.581	32.5775	24.2251	24.1793	27.6155	46.8098	1.34733	45.4428	84.9959	294.967	28.1522	24.2192	27.2725	34.7576	48.3784
M05	1	1	29.9167	788.276	491.094	306.642	1586.01	1.48449	48.006	106.742	358.115	42.417	30.8568	33.4551	34.6804	60.0233	1.80228	48.475	109.595	366.002	34.3501	32.1222	34.2839	44.1167	60.7862
M06	1	1	61.25	636.895	488.615	301.028	1426.54	1.24001	42.0578	75.172	287.716	34.3834	25.8962	28.4305	30.6978	49.5096	1.7567	41.2987	76.9662	296.911	33.658	25.8165	30.5127	36.2387	50.33
M07	1	1	46.5833	756.543	521.546	251.675	1529.76	2.00685	51.3199	98.5647	339.546	39.9939	28.8221	30.3318	34.3922	53.7596	2.73762	52.0848	104.28	355.177	30.2174	29.5603	34.1546	43.6682	57.9833
M08	1	1	55.9167	615.66	391.938	170.834	1178.43	1.68428	37.3023	76.2523	276.752	33.1081	24.1371	25.5727	29.476	48.8638	2.34014	38.4356	79.9071	290.297	30.6572	24.2165	27.1351	35.9783	51.247
M09	1	1	50.5833	595.436	437.38	246.131	1278.95	1.30893	42.8211	71.5446	269.8	32.4723	24.3851	25.2086	28.4435	43.2395	2.71817	41.7305	74.9965	277.041	27.2107	24.404	25.9918	34.6236	44.9928
M10	1	1	61.8333	507.502	395.177	296.216	1198.9	1.51193	31.3088	62.7768	229.244	27.7293	21.353	22.5378	25.5862	36.1342	1.55374	32.3842	65.6896	237.429	23.4005	21.2983	24.0099	29.7176	38.9708
M11	1	1	63.0833	529.611	352.631	254.479	1136.72	1.62842	36.1165	64.7449	238.74	27.6601	21.9628	22.5399	24.5919	39.1848	1.50101	38.0995	66.9264	246.654	23.0897	22.5412	24.4821	30.3541	39.343
M12	0	1	48.1667	739.114	539.102	228.909	1507.12	1.48188	47.3629	96.4545	335.654	36.8827	29.8805	31.2866	36.3244	55.4246	1.80328	45.6082	97.4666	342.98	35.2144	30.2132	34.7884	40.8073	56.6057
M13	1	1	47.5833	622.562	479.31	290.463	1392.33	1.44471	40.4123	79.0534	279.816	33.2849	24.9097	24.8862	29.4347	45.9573	2.32183	41.6782	82.2014	291.971	27.362	25.6778	25.6779	35.4613	51.1247
M14	0	1	42.0833	811.908	528.244	299.681	1639.83	1.95294	53.6836	105.084	367.544	42.3132	32.3884	32.0627	36.3042	63.3126	1.90913	54.8633	107.035	377.292	36.3944	31.59	35.0254	44.4874	65.5253
M15	0	1	49.4167	695.696	520.294	335.764	1551.75	1.39827	42.9042	90.3259	315.091	36.605	27.6933	29.3663	32.908	53.4455	2.01176	42.4783	91.6758	322.709	31.9027	28.3975	31.0018	39.5964	55.2697
M16	0	1	49.5	796.713	524.255	394.331	1715.3	1.44469	54.4399	106.331	362.125	40.346	28.1159	31.5282	35.2477	64.1859	1.80794	52.5745	102.821	366.083	34.1549	30.7316	36.4375	43.3849	63.7208
M17	1	1	51.0833	627.571	420.967	251.957	1300.5	1.93707	42.5569	76.7363	283.796	35.2182	24.9008	24.2846	31.8056	46.0528	2.66059	43.2548	80.4606	292.805	29.0701	24.3192	26.7737	36.7799	49.1759
M18	1	1	41.8333	578.682	419.827	199.433	1197.94	1.48926	38.5888	73.8219	261.586	28.5408	22.4645	24.4102	27.0755	44.8897	2.45001	39.1086	77.0444	270.458	24.0552	23.0997	26.5097	30.5505	47.2057
M19	1	1	44.9167	620.815	467.962	243.871	1332.65	1.46769	38.5114	80.1104	281.852	35.3094	25.4241	25.4097	28.4523	46.7886	1.89362	38.7286	83.3406	289.86	26.8277	25.4737	27.8728	37.2333	48.1468
M20	1	1	58.8333	609.712	435.502	262.628	1307.84	1.39226	39.9893	75.4404	272.608	32.6464	23.8743	26.4519	27.6424	44.805	1.95282	42.1626	80.0315	289.615	26.4338	25.1209	28.5478	35.9444	49.0257
M21	1	1	58.5	495.003	442.797	311.455	1249.26	1.08148	38.1958	61.0263	223.051	26.4326	19.8514	20.7323	20.8474	34.5524	1.38219	38.3941	62.4329	230.409	20.2484	20.7983	22.3888	27.7909	36.6559
M22	0	1	37.3333	659.37	432.401	204.754	1296.53	1.39481	47.7563	85.4105	299.068	34.8887	26.2926	27.5013	27.4157	48.0743	2.58514	48.9714	84.28	306.791	30.4721	27.0977	28.2375	36.8532	47.9002
M23	1	1	47.4167	638.892	460.693	192.037	1291.62	1.58453	42.2553	83.8059	287.345	34.0395	25.1348	28.0163	28.2828	43.7694	2.09234	43.0524	87.1854	300.818	28.2118	25.4312	29.915	36.6088	47.8138
